# Supplementary material for: Anti-Neuroblastoma Properties of a Recombinant Sunflower Lectin
Source: MDPI journal article supplement (doi:10.3390/ijms18010092), 2017-01-10
Supplement: s1 [file s1]

# Supplementary Materials: Anti-Neuroblastoma Properties of a Recombinant Sunflower Lectin

Marcela Pinedo, Melanie Genoula, María Ximena Silveyra, André De Oliveira Carvalho, Mariana Regente, Marianela Del Río, Júlia Ribeiro Soares, Valdirene Moreira Gomes and Laura De La Canal

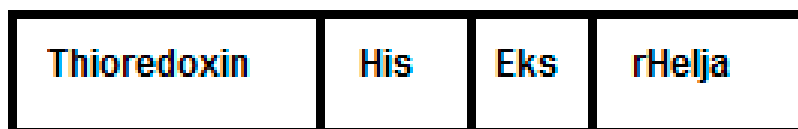

**Figure S1.** Recombinant protein with the fusion of Thioredoxin, histidine tag (His), enterokinase digestion site (Eks) and Helja.

MSDKIIHLTD DSFDTDVLKA DGAILVDFWA EWCGPCKMIA PILDEIADEY QGKLTVAKLN  
IDQNPQTAPK YGIRGIPTLL LFKNGEVAAT KVGALSKGQL KEFLDANLAG SGSGHMH~~HHH~~  
~~HH~~SSGLVPRG SGMKETAAAK FERQHMDSPD LGTDDDDKMA NNYVEVGPWG GSGGANPWSI  
IPNGGRITRI NVRSGAIVDA IYFGYTEGGT NYETAIFGGR NGSLSTIDIA DDEEIIIEING  
KVATFENLNL VTQLTFVTNK QTHGPYGTNG GTDFSCPIAK GKVVGFFGRY GAYLDAIGVV LSP.

A-Scheme representing the recombinant protein with the fusion of Thioredoxin, histidine tag (His), enterokinase digestion site (Eks) and Helja.

B-Deduced amino acid sequence from the nucleotide sequencing of the pET-32 EK/LIC vector (pET System Manual, Novagen) containing Helja CDS. The sequence was provided by Unidad Genomica, a facility of the Instituto de Biotecnología-at—INTA Castelar, Argentina using the forward and reverse primers for T7. Reverse sequences were converted to the antiparallel strand, and the two readings were aligned using Clustal Omega at <http://www.ebi.ac.uk/Tools/msa/clustalo/> (Sievers and Higgins, 2014). Bold letters indicate the aminoacidic sequence for thioredoxin while histidine tag and enterokinase digestion site are underlined and Helja sequence is indicated in italic.

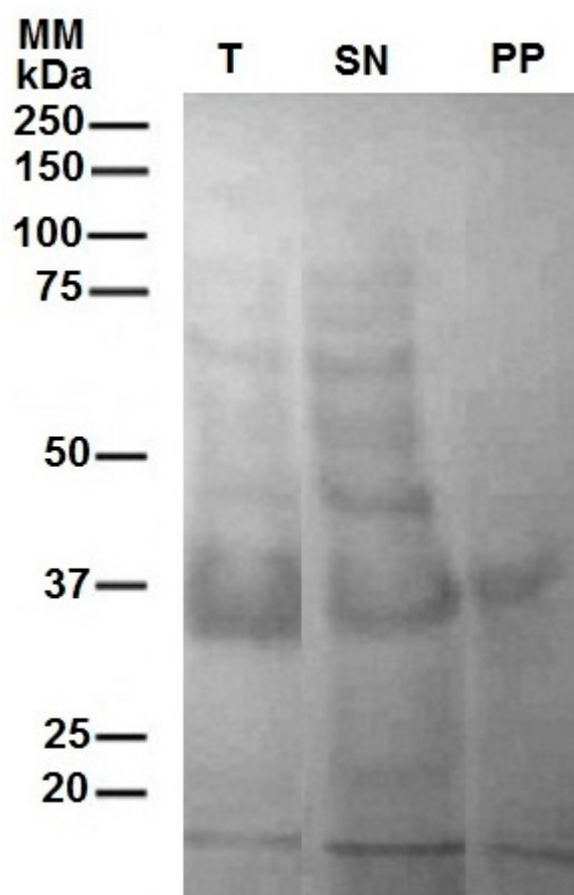

**Figure S2.** Protein profile of extracts obtained after lysis of IPTG induced cells cultures. The extracts (T) were centrifuged at 10.000× g 30 min. The supernatant (SN) and the pellet (PP) were loaded on a 12% SDS-PAGE on the base of an equivalent cell number, and subsequently stained with Coomassie Brilliant Blue.
